# Supplementary material for: Cracking down on vapochromic salts: unveiling vapomechanical stress in gas-sorbing platinum complexes
Source: Royal Society of Chemistry journal article supplement (doi:10.1039/d4dt02053g), 2024-11-15
Supplement: d4dt02053g1.pdf [file d4dt02053g1.pdf]

# Cracking Down on Vapochromic Salts: Unveiling Vapomechanical Stress in Gas-Sorbing Platinum Complexes

Amie E. Norton<sup>b,c\*</sup> Stephen D. Taylor<sup>c, d\*</sup> Caroline Williams,<sup>a</sup> Ann Zoller,<sup>a</sup> Watts Dietrich,<sup>a</sup>  
William B. Connick,<sup>a, e</sup> and Sayandev Chatterjee<sup>e\*</sup>

<sup>a</sup>Department of Chemistry, University of Cincinnati, Cincinnati, Ohio 45221, United States

<sup>b</sup>Department of Entomology, Kansas State University, Manhattan, KS 66506, United States

<sup>c</sup>Authors contributed equally to the work

<sup>d</sup>The Laboratory Safety Institute, Natick, MA 01760, United States

<sup>e</sup>TerraPower LLC, Bellevue, WA 98008

<sup>€</sup>This work is dedicated to the memory of Prof. William B Connick who passed away on April 22, 2018.

\*Corresponding authors' email: [amien@ksu.edu](mailto:amien@ksu.edu); [stephen@labsafetyinstitution.org](mailto:stephen@labsafetyinstitution.org);  
[schatterjee@terrapower.com](mailto:schatterjee@terrapower.com)

## Table of Contents

| Figure                                                                                                                                                       | Page Number |
|--------------------------------------------------------------------------------------------------------------------------------------------------------------|-------------|
| <b>Figure SI 1.</b> Microscope slide of microcrystals                                                                                                        | 2           |
| <b>Figure SI 2.</b> Pictures of crystals after 5 cycles of solvated and desolvated.                                                                          | 2           |
| <b>Figure SI 3.</b> X-ray powder diffractograms of [Pt(tpy)Cl](PF <sub>6</sub> ) under different conditions.                                                 | 3           |
| <b>Figure SI 4.</b> XRPD pattern of [Pt(tpy)Cl]PF <sub>6</sub> .CH <sub>3</sub> CN as it is being heated.                                                    | 3           |
| <b>Figure SI 5.</b> XRPD diffractograms of [Pt(tpy)Cl](PF <sub>6</sub> ) cycled between the non-solvated (—) and solvated forms (—).                         | 4-6         |
| <b>Figure SI 6.</b> Emission spectra of crystals of [Pt(tpy)Cl](PF <sub>6</sub> ) before (—) and during vapor absorption (—) / vapor desorption (—) cycling. | 7           |
| <b>Figure SI 7.</b> Intensity at 693nm divided by intensity at 593 nm.                                                                                       | 7           |
| <b>Figure SI 8.</b> Intensity at 690 nm vs cycle number                                                                                                      | 8           |
| <b>Figure SI 9.</b> Solvated intensity at 600 nm vs cycle number                                                                                             | 8           |
| <b>Figure SI 10.</b> Intensity at 706 nm vs cycle number                                                                                                     | 9           |
| <b>Figure SI 11.</b> Intensity at 690 nm, Intensity at 600 nm for solvated                                                                                   | 9           |
| <b>Figure SI 12.</b> FWHM of desorption (black) and absorption (red).                                                                                        | 10          |
| <b>Figure SI 13.</b> Excitation of 1.PF <sub>6</sub>                                                                                                         | 10          |
| <b>Figure SI 14.</b> Picture of 17 crystals that were absorbed with acetonitrile. A) before absorption. B) after absorption                                  | 11          |
| <b>SI Table 1.</b> The motions of seventeen crystals of [Pt(tpy)Cl](PF <sub>6</sub> )                                                                        | 12          |
| <b>Figure SI 15.</b> SEM images (A, B, C and D) and BSE images                                                                                               | 13          |
| <b>Figure SI 16.</b> SEM images of crystals grown at 20°C before (a,c) acetonitrile and after acetonitrile.                                                  | 13          |

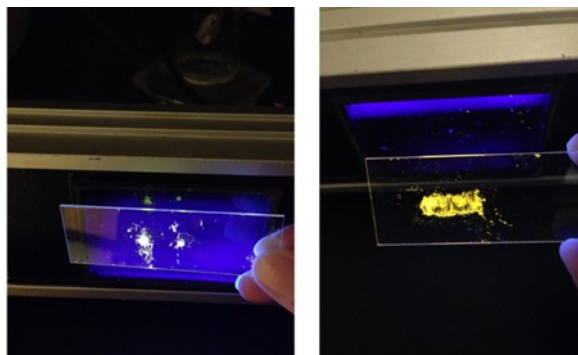

**Figure SI 1.** Microscope slide of microcrystals (left) Luminescence of crystals before exposure to acetonitrile (right) Luminescence of crystals after exposure to acetonitrile and desolvated

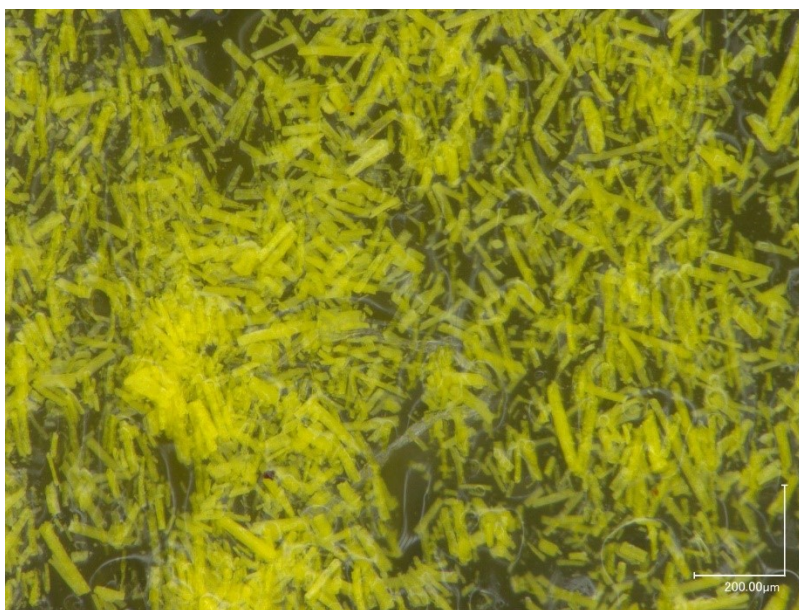

**Figure SI 2.** Pictures of crystals after 5 cycles of solvated and desolvated. The same crystals that were used in the emission experiment

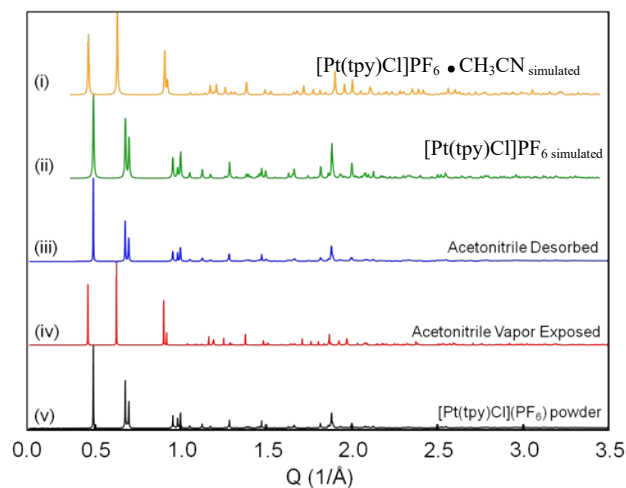

**Figure SI 3.** X-ray powder diffractograms of  $[\text{Pt}(\text{tpy})\text{Cl}](\text{PF}_6)$  under different conditions. Simulated powder diffraction patterns for and  $[\text{Pt}(\text{tpy})\text{Cl}](\text{PF}_6)\cdot\text{CH}_3\text{CN}$  (i, orange) and  $[\text{Pt}(\text{tpy})\text{Cl}](\text{PF}_6)$  at 298K (ii, green).

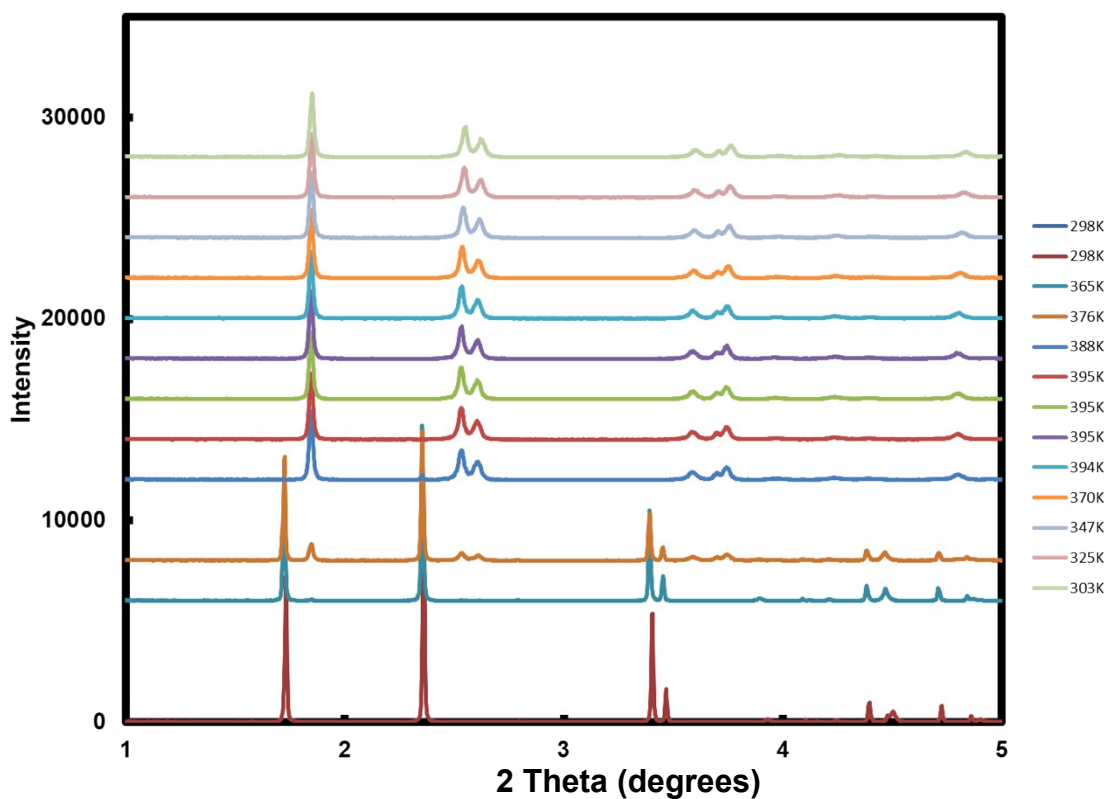

**Figure SI 4:** XRPD pattern of  $[\text{Pt}(\text{tpy})\text{Cl}]\text{PF}_6\cdot\text{CH}_3\text{CN}$  as it is being heated.

a)

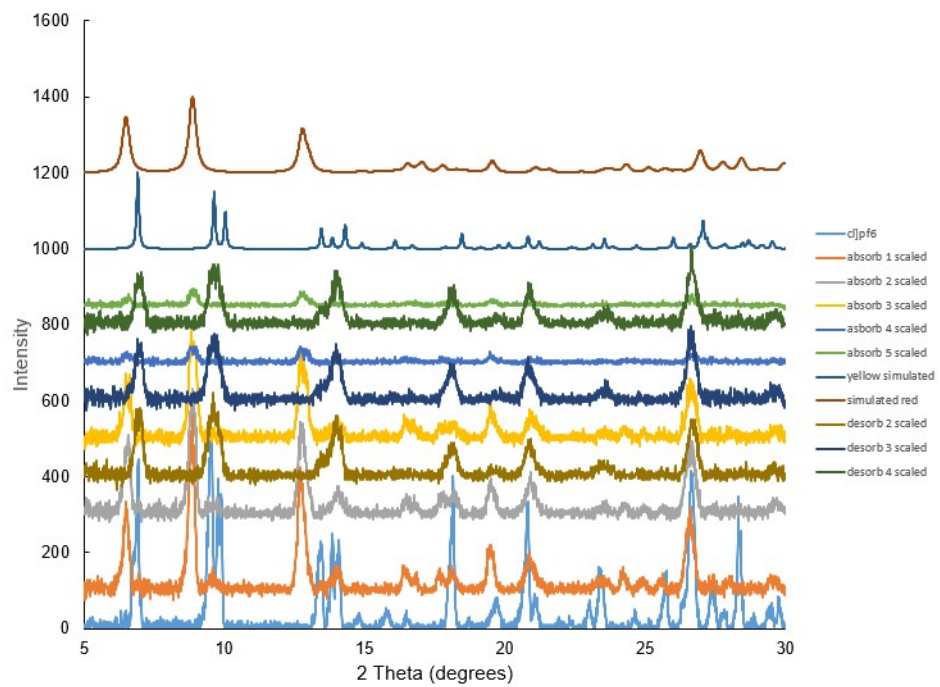

b)

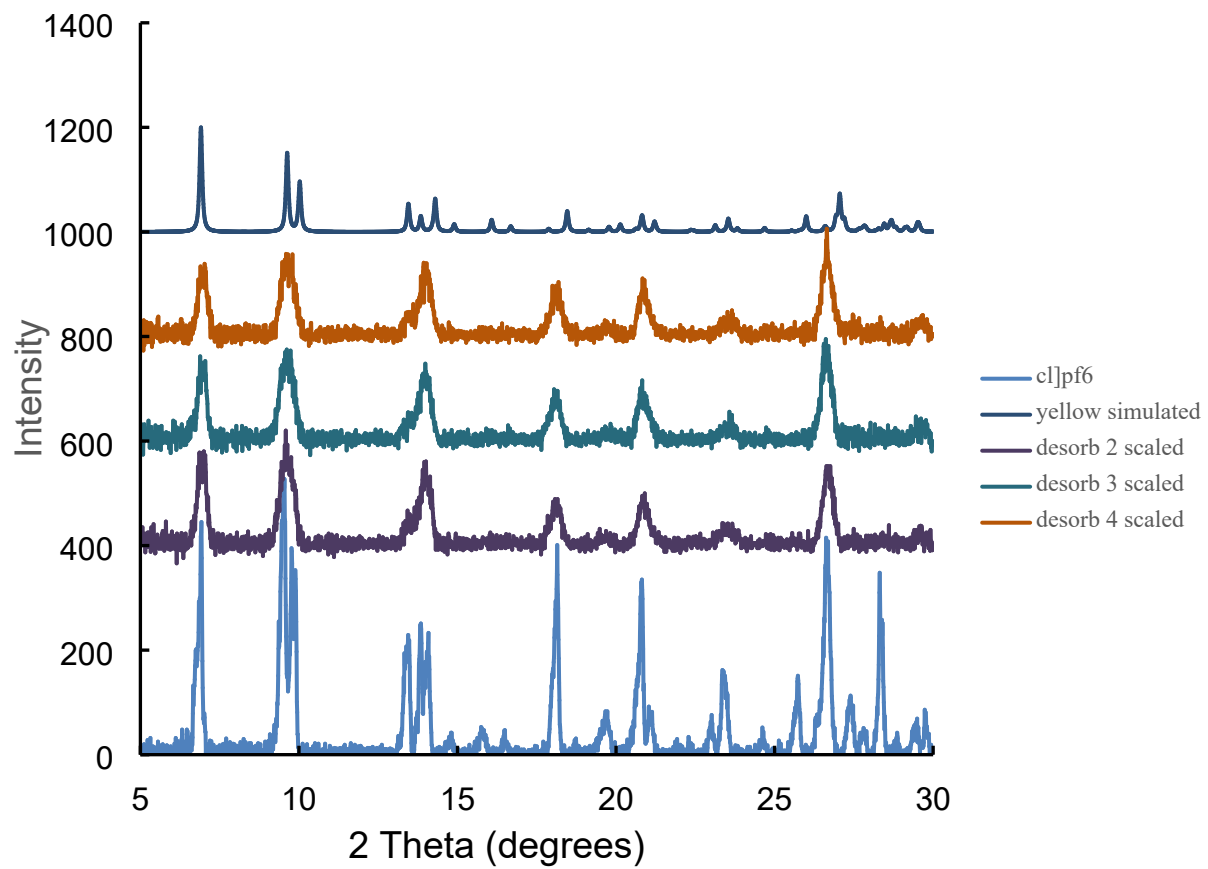

c)

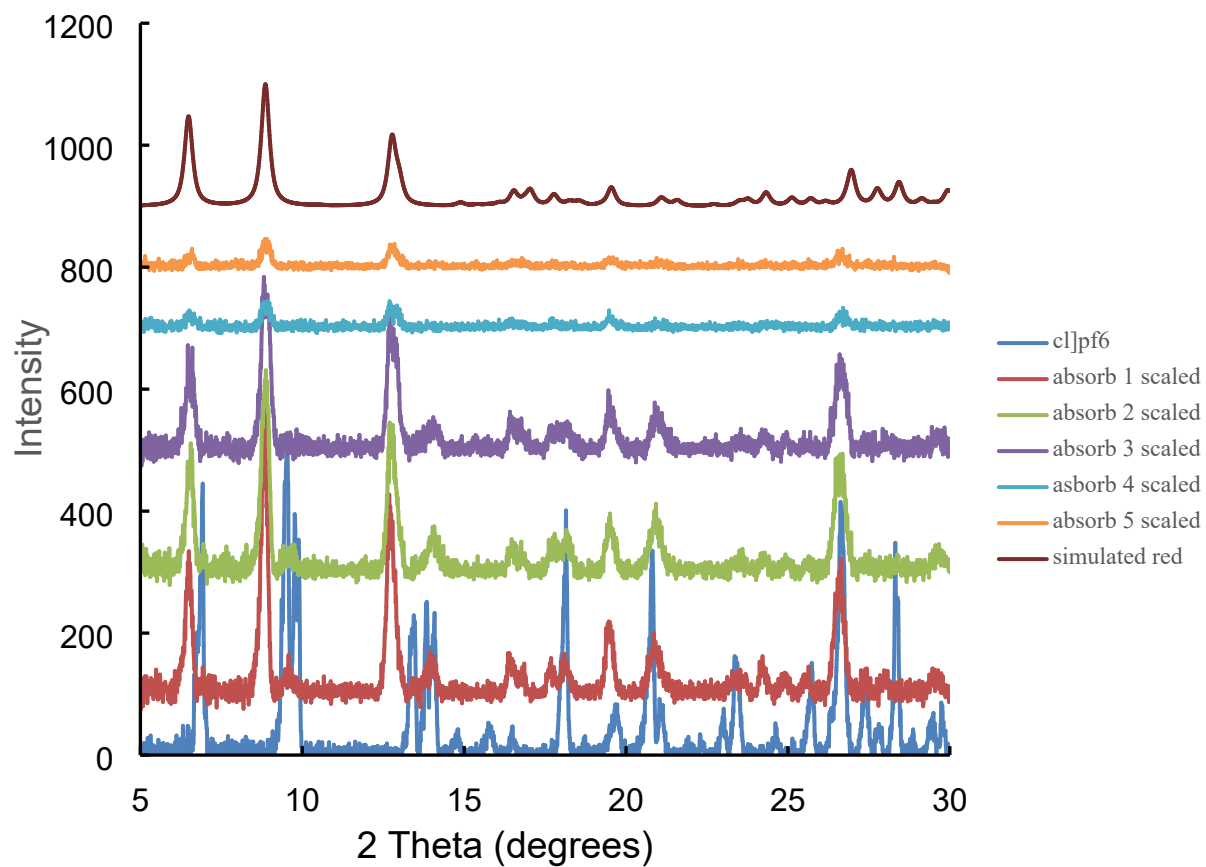

**Figure SI 5.** XRPD diffractograms of  $[\text{Pt}(\text{tpy})\text{Cl}](\text{PF}_6)$  cycled a) all the cycles together b) only the desorbed “yellow” forms together c) the absorbed “red” forms together

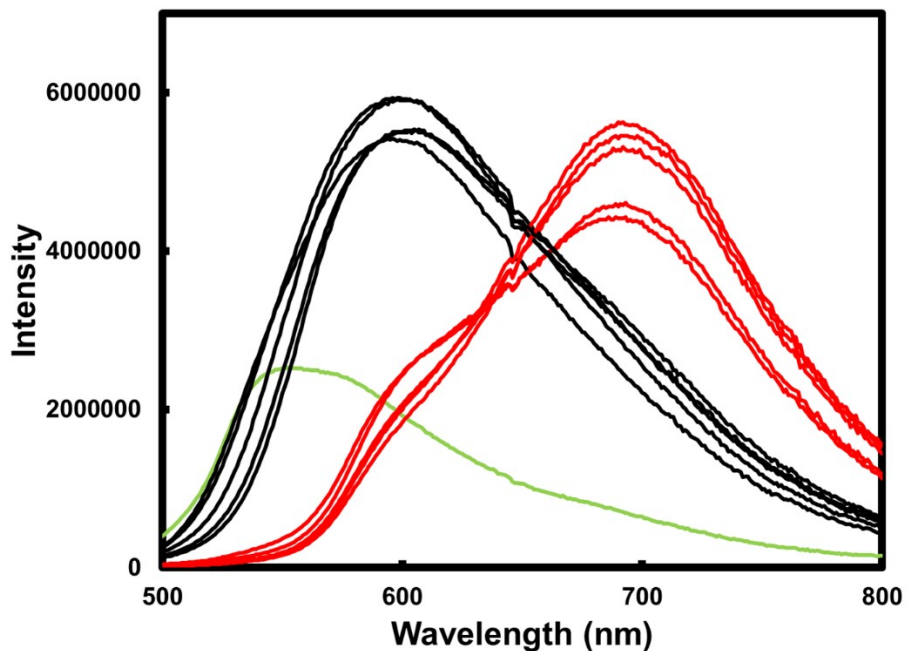

**Figure SI 6.** Emission spectra of crystals of  $[\text{Pt}(\text{tpy})\text{Cl}](\text{PF}_6)$  before (—, (green)) and during vapor absorption (—, (red)) / vapor desorption (—, (black)) cycling.

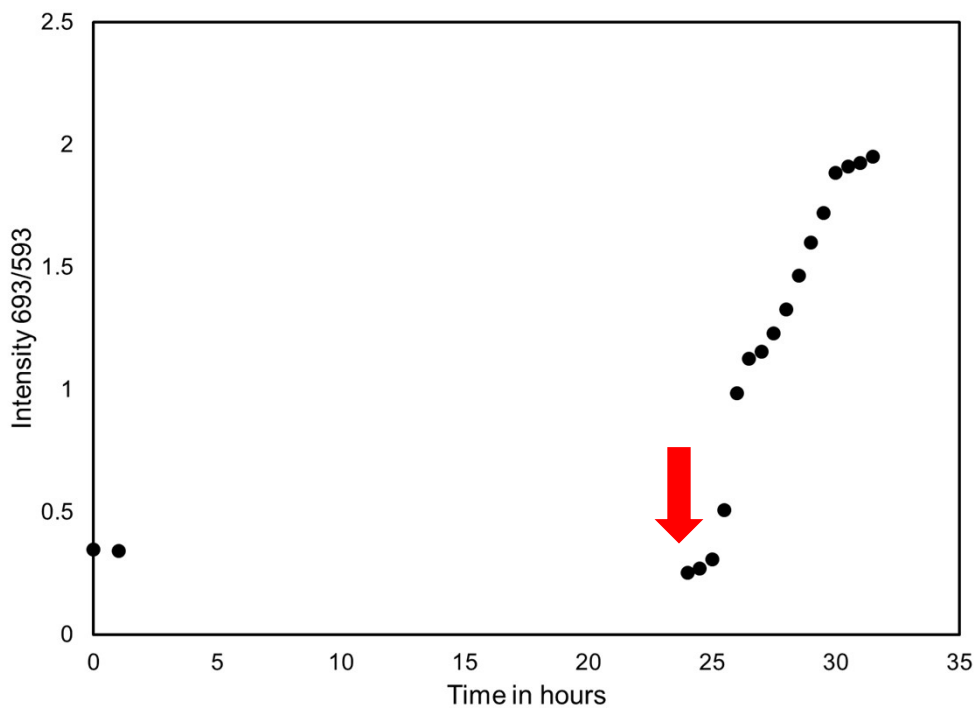

**Figure SI 7.** Intensity at 693nm divided by intensity at 593 nm. The red arrow depicts the point at which the sample was heated during desorption.

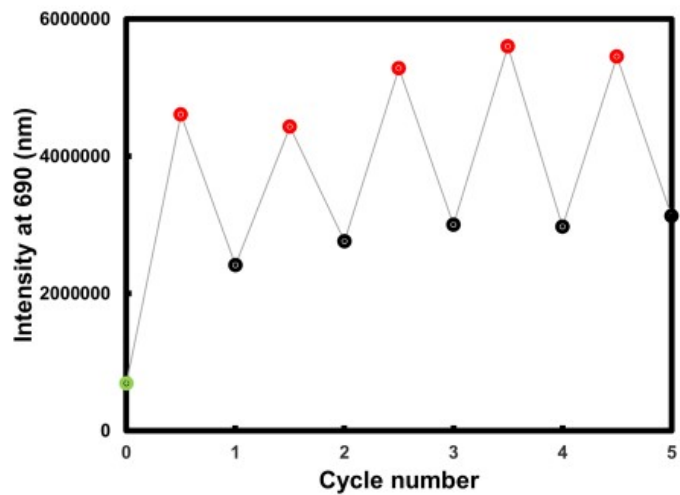

**Figure SI 8.** Intensity at 690 nm vs cycle number for crystals of [Pt(tpy)Cl](PF<sub>6</sub>) (●, green), as well as the acetonitrile vapor-desorbed (●, black) and vapor-absorbed (●, red) forms vs. cycle number.

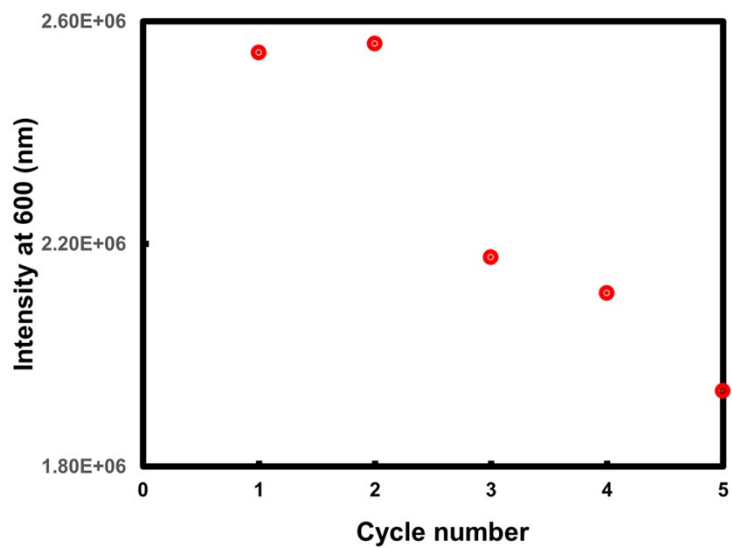

**Figure SI 9.** Solvated intensity at 600 nm vs cycle number



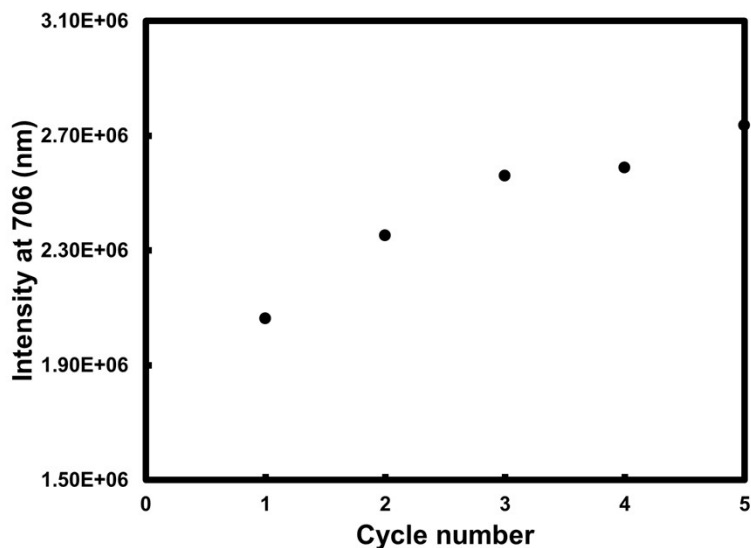

**Figure SI 10.** Intensity at 706 nm vs cycle number

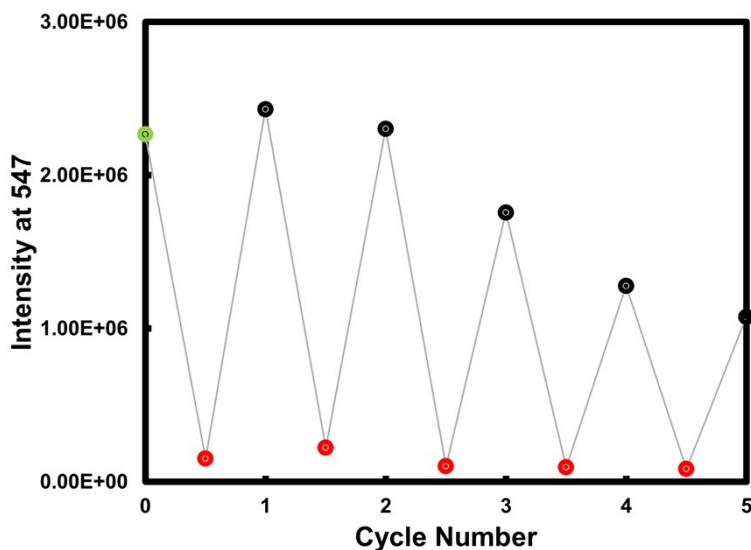

**Figure SI 11.** Intensity at 690 nm, Intensity at 600 nm for solvated form, Intensity at 706 nm for non-solvated form and Intensity at 547 nm required to complete vapor absorption vs. cycle number for crystals of [Pt(tpy)Cl](PF<sub>6</sub>) (●, green), as well as the acetonitrile vapor-desorbed (●, black) and vapor-absorbed (●, red) forms vs. cycle number.

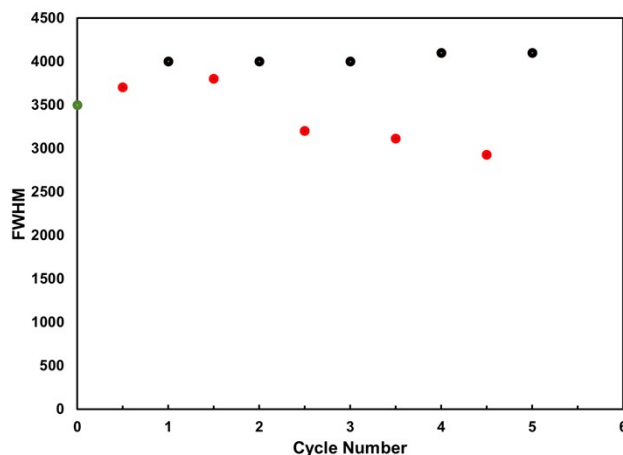

**Figure SI 12.** FWHM of desorption (black) and absorption (red). The original spectrum FWHM is in green.

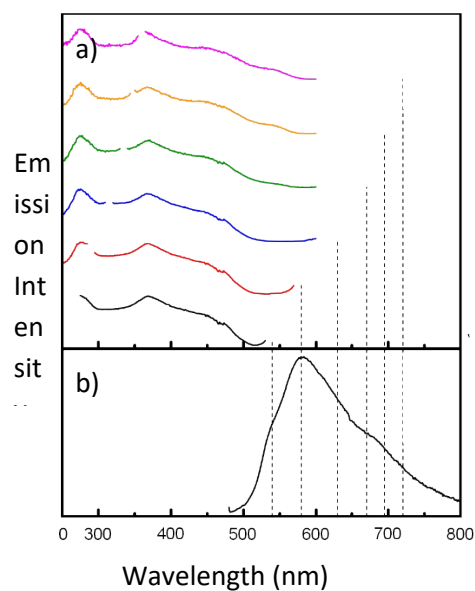

**Figure SI 13.** a) Excitation spectra of  $[\text{Pt}(\text{tpy})\text{Cl}](\text{PF}_6)$  crystals at different monitored emission wavelengths (—,  $\lambda_{\text{em}} = 540$  nm; — (red), 580 nm; —, (blue) 630 nm; —, (green) 670 nm; —, (orange) 695 nm; —, (pink) 720 nm. b) Emission spectrum of **1** crystal (—,  $\lambda_{\text{ex}} = 436$  nm). Dashed lines indicate monitored emission wavelengths for each excitation spectra in a). The emission intensities were arbitrarily scaled.

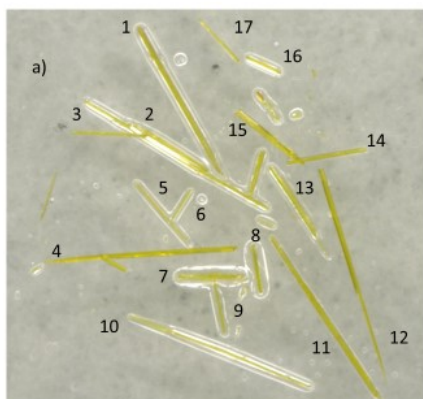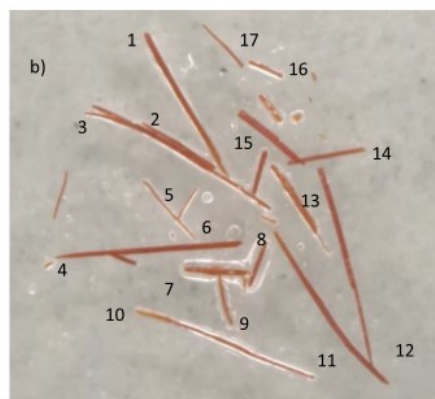

**Figure SI 14.** Picture of 17 crystals that were absorbed with acetonitrile. A) before absorption. B) after absorption

**SI Table 1.** The motions of seventeen crystals of [Pt(tpy)Cl](PF)<sub>6</sub> in paratone oil when exposed to acetonitrile vapor.

| Crystal Number | size l x w (mm) | First Appearance of color | Movement                                |
|----------------|-----------------|---------------------------|-----------------------------------------|
| 1              | 1.5x0.2         | Needle tip                | none                                    |
| 2              | 0.5x.1          | edge                      | spins and splits at top                 |
| 3              | 0.45x.05        | edge                      | rotates 15° and translates by ~0.125 mm |
| 4              | 1x0.05          | edge                      | none                                    |
| 5              | 0.375 x0.1      | Needle tip                | curls                                   |
| 7              | 0.375x.1        | Needle tip                | rotates 3° clockwise                    |
| 8              | 0.3x0.1         | Needle tip                | rotates about needle axis               |
| 9              | 0.1x0.001       | Needle edge               | bends 5°                                |
| 10             | 0.55x0.15       | Needle edge               | curls                                   |
| 11             | 1.125x0.15      | Needle edge               | bends 25°                               |
| 12             | 1.125x0.15      | Needle edge               | Crystal bends 25°                       |
| 13             | 0.25x0.1        | Needle edge               | none                                    |
| 14             | 0.75x0.05       | Needle edge               | none                                    |
| 15             | 1x0.1           | middle                    | Rotated 17.6°                           |
| 16             | 0.15x0.01       | Needle edge               | none                                    |
| 17             | 0.25x0.01       | Needle edge               | none                                    |

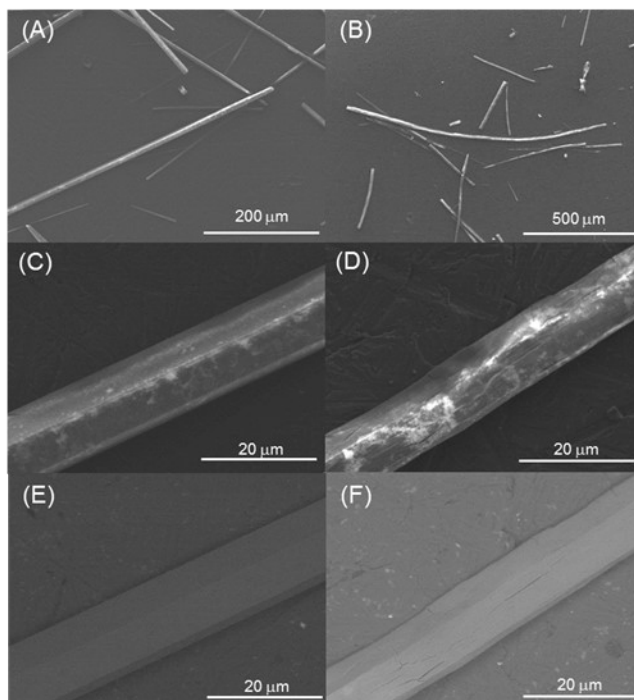

**Figure SI 15.** SEM images (A, B, C and D) and BSE images (E and F) of  $[\text{Pt}(\text{tpy})\text{Cl}](\text{PF}_6)$  before (Left column) and after (Right column) exposure to acetonitrile.

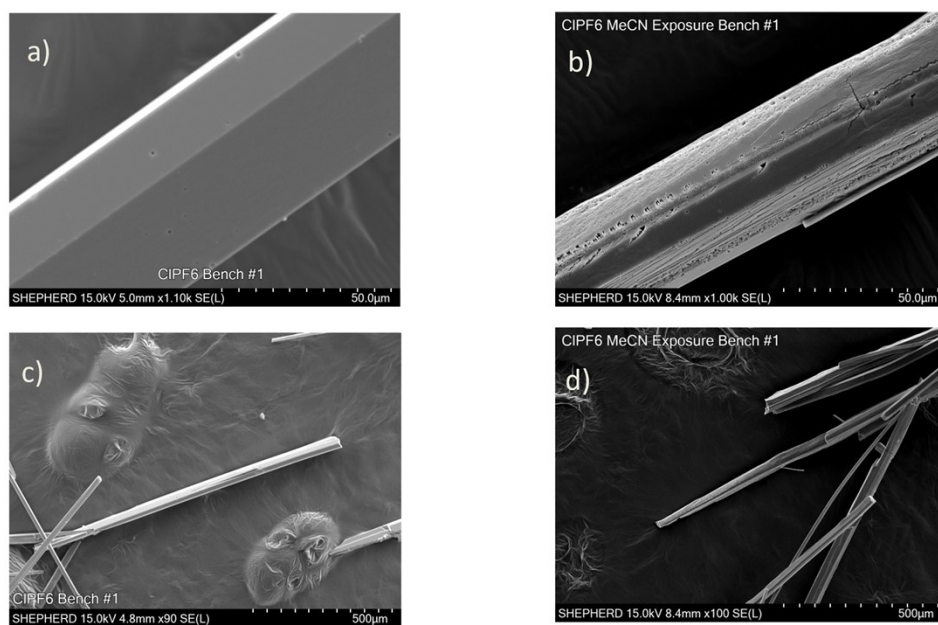

**Figure SI 16.** SEM images of crystals grown at  $20^\circ\text{C}$  before (a,c) acetonitrile and after acetonitrile.
